# Supplementary material for: X-ray characterization, Hirshfeld surface analysis, DFT calculations,in vitroandin silicolipoxygenase inhibition (LOX) studies of dichlorophenyl substituted 3-hydroxy-chromenones
Source: Royal Society of Chemistry journal article supplement (doi:10.1039/d1nj04340d), 2021-01-01
Supplement: d1nj04340d1.pdf [file d1nj04340d1.pdf]

## Electronic Supplementary Information for manuscript:

### **X-Ray characterization, Hirshfeld surface analysis, DFT calculations, *in vitro* and *in silico* lipoxygenase inhibition (LOX) studies of dichlorophenyl substituted 3-hydroxy-chromenones**

Muhammad Naeem Ahmed,<sup>\*a</sup> Mehreen Ghias<sup>b</sup>, Syed Wadood Ali Shah<sup>b</sup>, Mohammad Shoaib<sup>b</sup>, Muhammad Nawaz Tahir<sup>c</sup>, Muhammad Ashfaq<sup>c</sup>, Mahmoud A. A. Ibrahim<sup>d</sup>, Hina Andleeb,<sup>e</sup> Diego M. Gil<sup>f</sup> and Antonio Frontera<sup>\*g</sup>

#### **Table of contents:**

|                                               |               |
|-----------------------------------------------|---------------|
| <b>Description of the X-ray packing in 1:</b> | <b>Page 2</b> |
| <b>Description of the X-ray packing in 2:</b> | <b>Page 4</b> |
| <b>Description of the X-ray packing in 3:</b> | <b>Page 8</b> |

## Description of the X-ray packing of compound 1

In **1** (Fig. S1), 3-hydroxychroman-4-one moiety A (C1-C9/O1-O3) and 1,3-dichlorobenzene ring B (C10-C15/C6CL1/CL2) are roughly planar with root mean square (r.m.s) deviation of 0.0207 and 0.0271 Å, respectively. Dihedral angle among mean plane of moiety A and ring B is 59.92 (3)°. Selected bond lengths and bond angles are specified in Table S1. The molecular configuration of **1** is stabilized by intramolecular O-H...O bonding to form S (5) as displayed in Fig. S2. The molecules are interlinked in the form of dimers by strong O-H...O bonding to form  $R_2^2(10)$  loop in which carbonyl O-atom acts as H-bond acceptor. The dimers are connected with each other through weak non-covalent interaction of type C-O... $\pi$  with O... $\pi$  distance ranges from 3.405 Å to 3.962 Å, carbonyl O-atom is involved in this interaction. The molecules are further interlinked by off-set  $\pi$ ... $\pi$  stacking interaction between aromatic rings with inter-centroid separation ranges from 3.993 Å to 4.192 Å with ring off-set range from 1.918 Å to 2.410 Å. A zigzag chain of molecules is formed along [001] due to this interaction as displayed in Fig. S3. The crystal packing is further stabilized by weak C-H... $\pi$  interaction with H... $\pi$  distance ranges from 2.80 Å to 2.88 Å that connect the molecules along [100] direction to form infinite chain as displayed in Fig. S4.

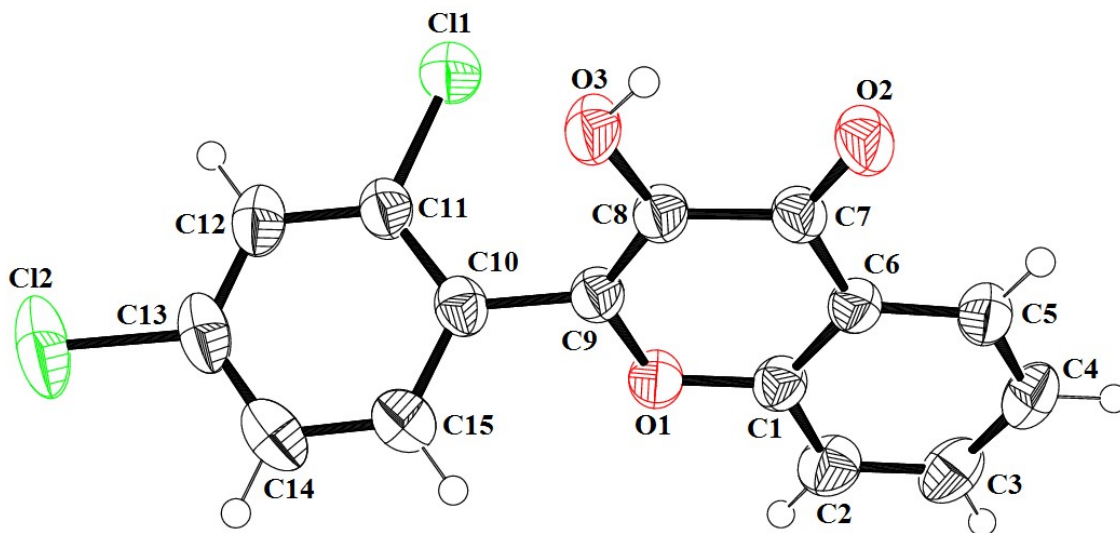

**Fig. S1** ORTEP diagram of **OF5** drawn at probability level of 50%. H-atoms are shown by small circle of arbitrary radii.

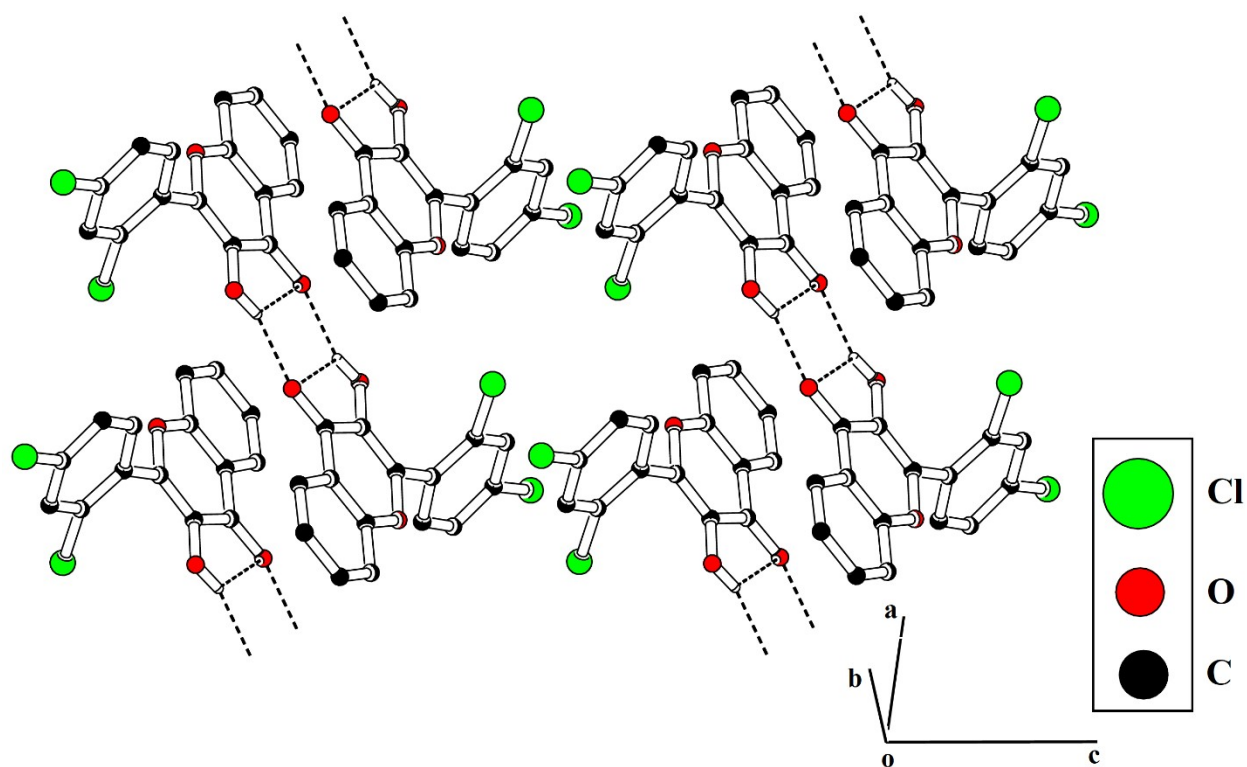

**Fig. S2** Packing diagram of **1** showing dimerization of molecules through O-H...O bonding. Selected H-atoms are shown for clarity.

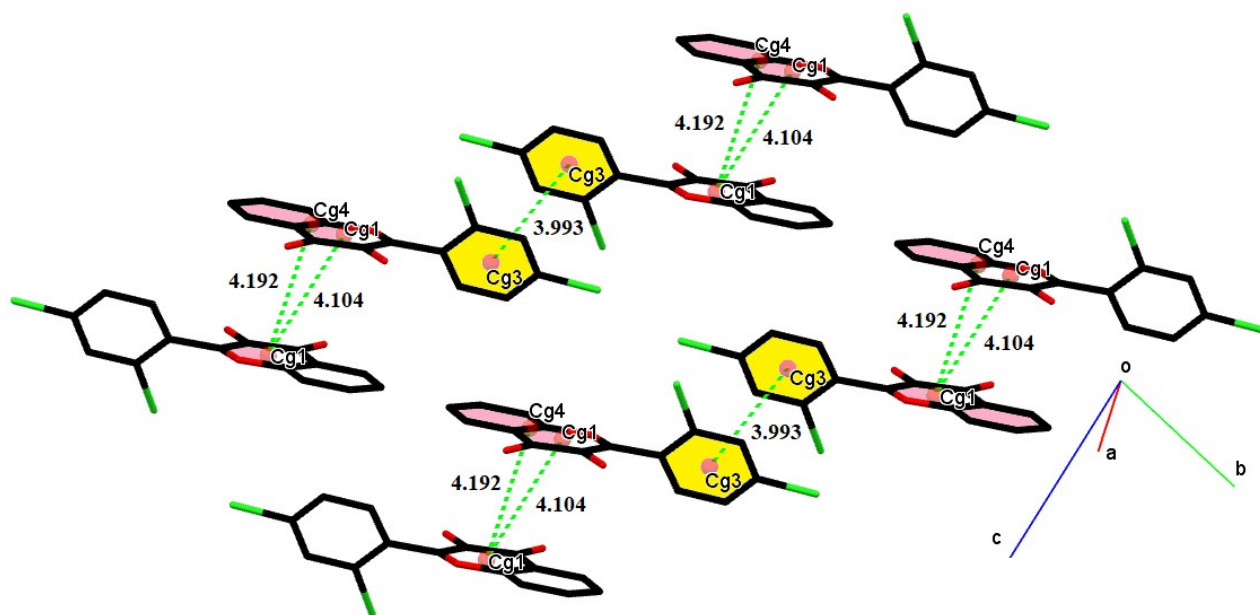

**Fig. S3** Graphical representation of off-set  $\pi\cdots\pi$  stacking interaction in **1** that links the molecules along [001] direction. H-atoms are not shown for clarity. Distances are measured in Å.

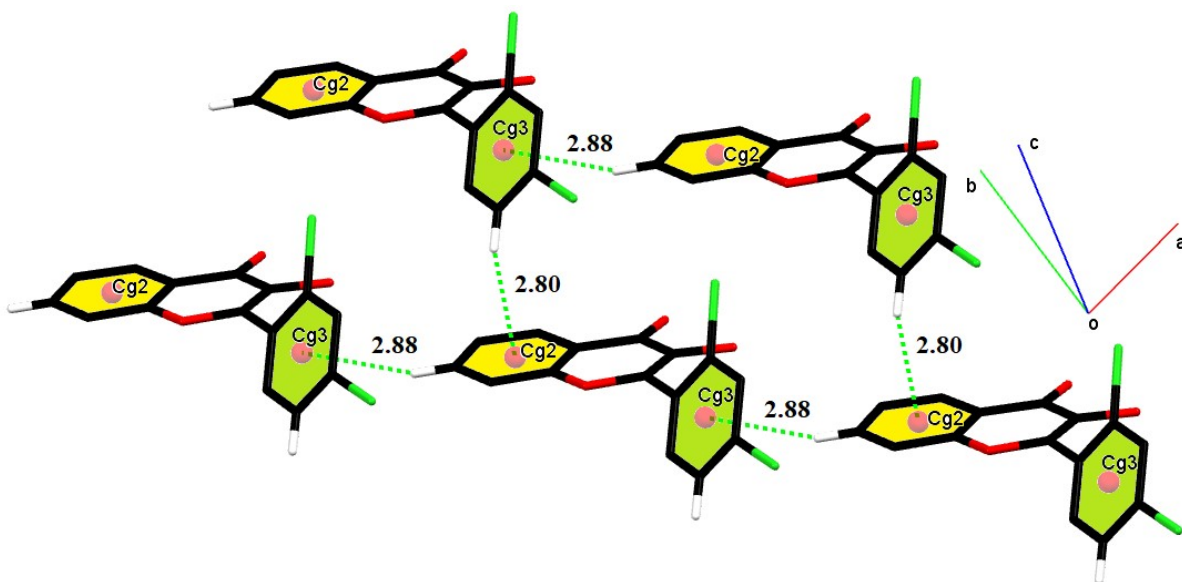

**Fig.: S4** Graphical representation of C-H... $\pi$  interaction for **1**. Selected H-atoms are shown for clarity. Distances are measured in Å.

### Description of the X-ray packing in compound **2**

In **2** (Fig. S5), 3-hydroxychroman-4-one moiety A (C1-C9/O1-O3) and 1,2-dichlorobenzene ring B (C10-C15/CL1/CL2) are roughly planar with root mean square (r.m.s) deviation of 0.0164 and 0.0048 Å, respectively. Dihedral angle among mean plane of moiety A and ring B is 69.64 (3)°. Selected bond lengths and bond angles are specified in Table S2. The molecular configuration of **2** is stabilized by intra-molecular O-H...O bonding to form S (5) loop. The molecules are interlinked in the form of dimers by strong O-H...O bonding to form  $R_2^2(10)$  loop in which carbonyl O-atom acts as H-bond acceptor. The dimers are interlinked through comparatively weak C-H...O bonding to form  $R_2^2(16)$  loop in which O-atom of hydroxyl group acts as H-bond acceptor as displayed in Fig. S6 and specified in Table S2. C11 zigzag chain is formed by the combination of O-H...O and C-H...O bonding that runs along a crystallographic axis as displayed in Fig. S7. The molecules related by inversion symmetry (-x, 1-y, -z) are involved in C-O... $\pi$  interaction in which carbonyl group of one molecule is connected with phenyl ring (C11-C16) of other molecule with O... $\pi$  distance of 3.83 Å as displayed in Figs S8 and S9. The crystal packing is further stabilized by another non-covalent interaction of type off-set  $\pi\cdots\pi$  interaction. For this

interaction, centroid to centroid separation ranges from 3.56 Å to 4.11 Å and ring off-set ranges from 0.97 Å to 2.26 Å. Overall 2D network is formed by the molecules through O-H...O bonding C-O... $\pi$  and off-set  $\pi$ ... $\pi$  stacking interaction in the plane (100) with base vectors [001] and [010].

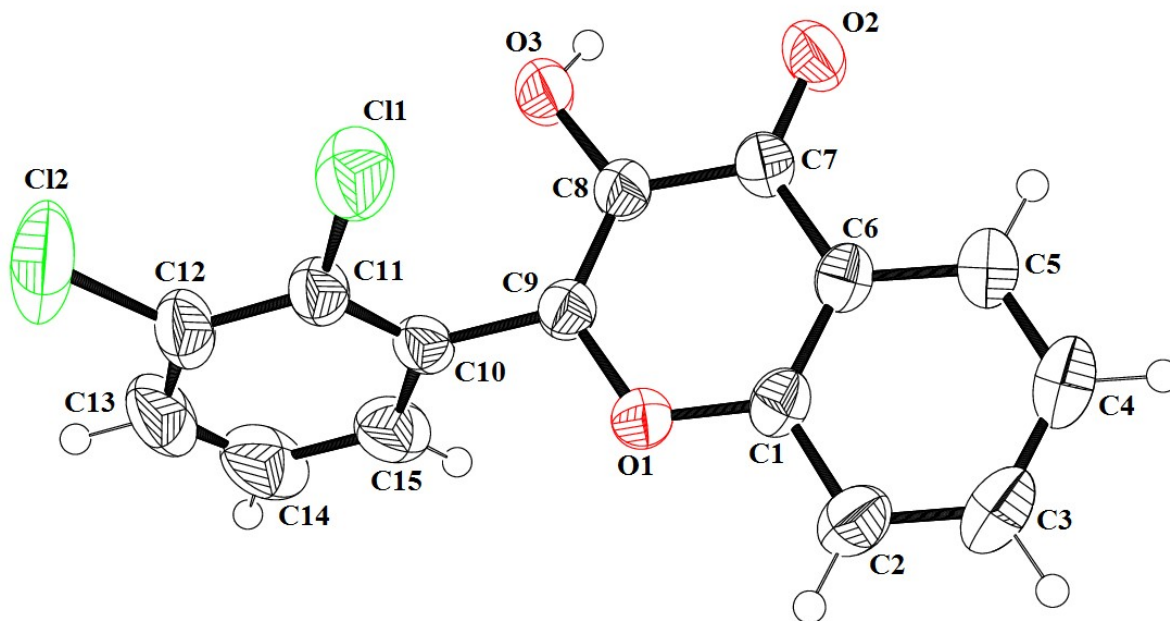

**Fig. S5** ORTEP diagram of **2** drawn at probability level of 50%. H-atoms are shown by small circle of arbitrary radii.

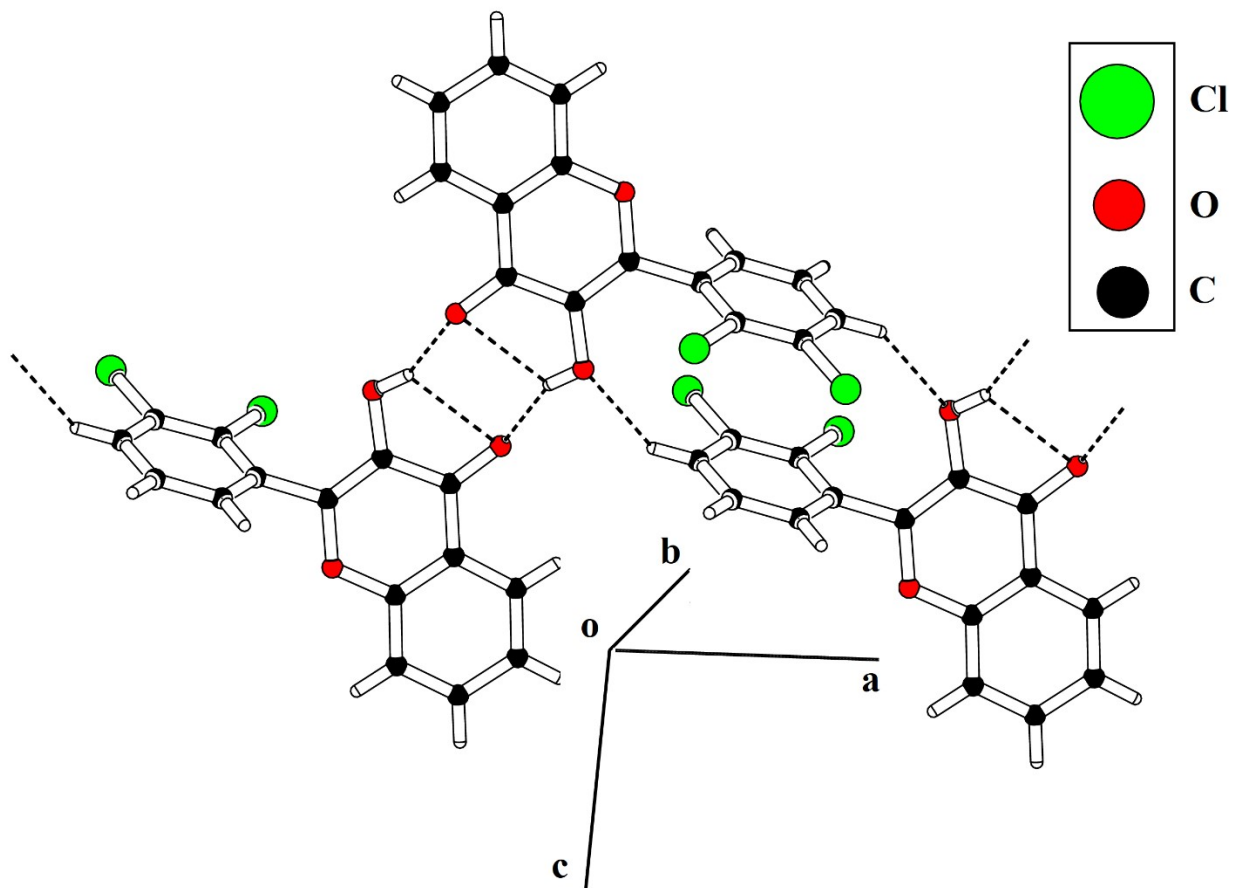

**Fig. S6** First view of packing diagram of **2** indicating dimerization of molecules through H-bonding.

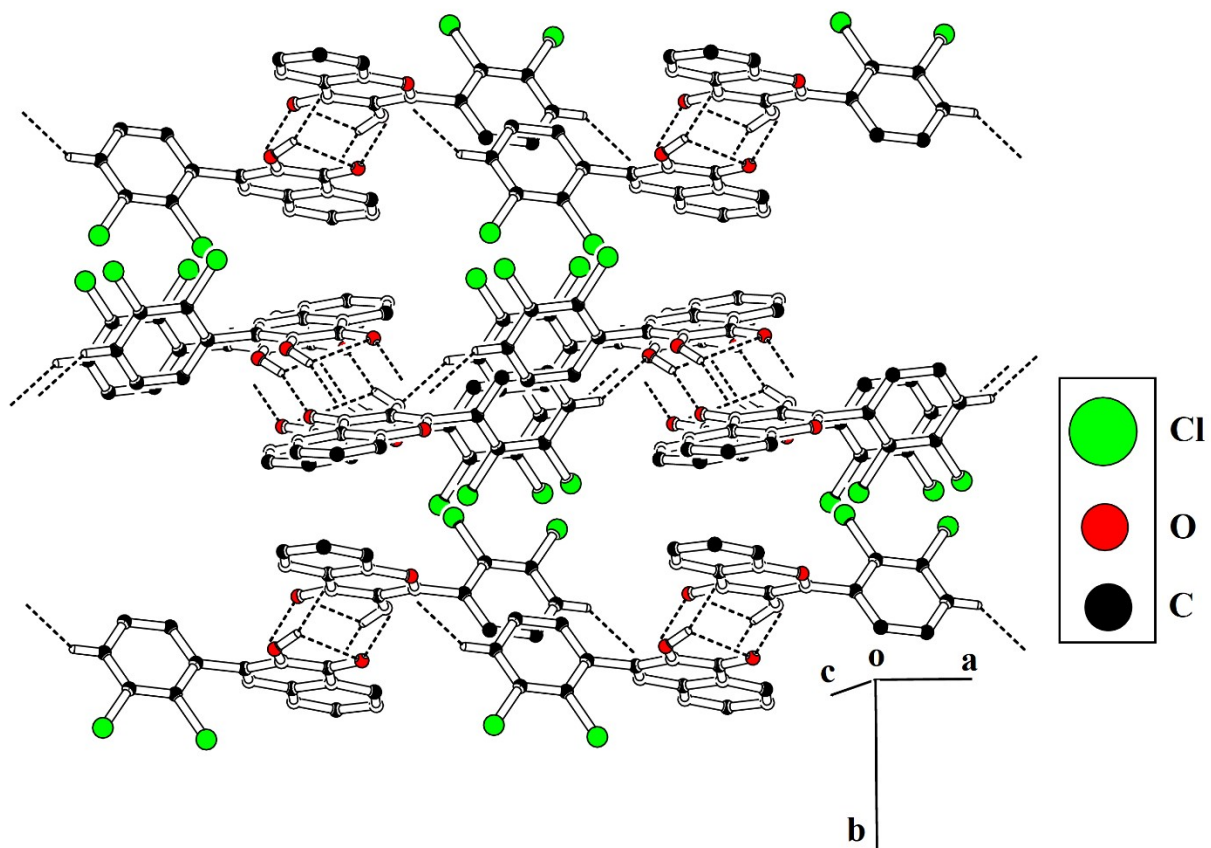

Fig. S7 Second view of packing diagram of **2**, selected H-atoms are shown for clarity.

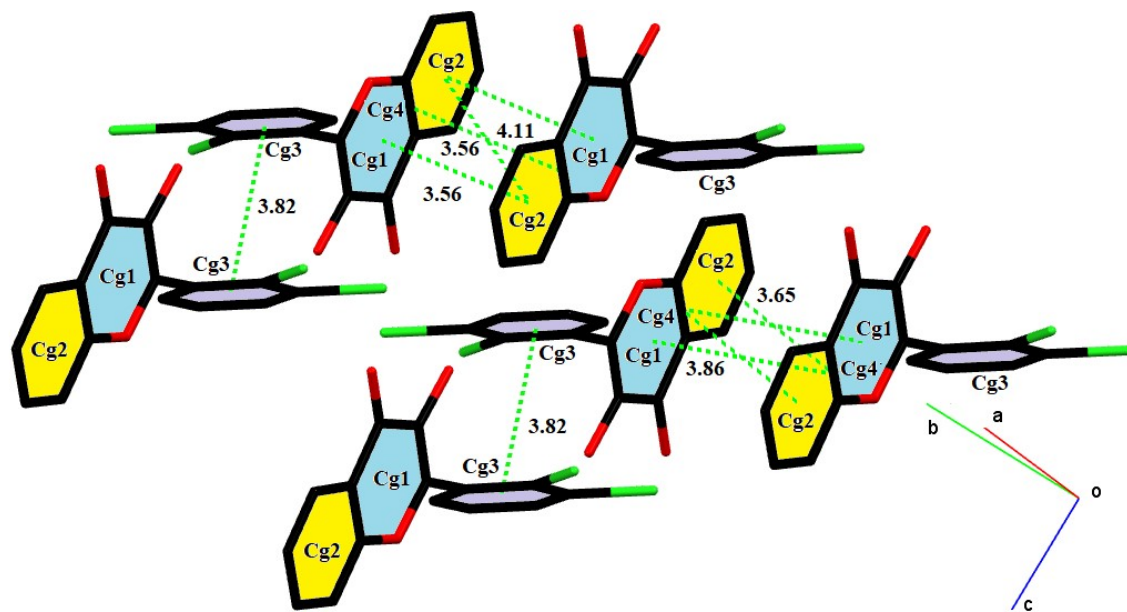

**Fig. S8** Graphical representation of off-set  $\pi$ ... $\pi$  stacking interaction in **2**. H-atoms are not shown for clarity. Distances are measured in Å.

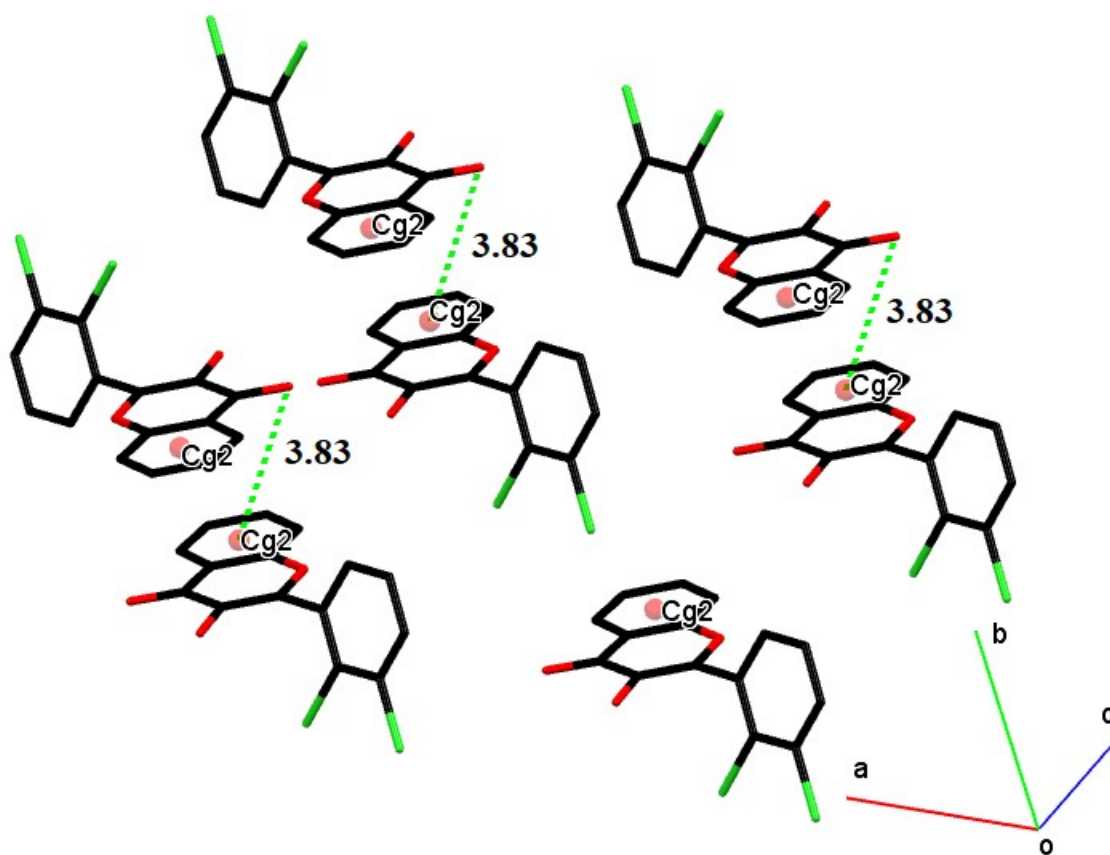

**Fig. S9** Graphical representation of C-O... $\pi$  interaction in **OF6**. H-atoms are not shown for clarity. Distances are measured in Å.

### Description of the X-ray packing in compound **3**

In **3** (Fig. S10), 3-hydroxychroman-4-one moiety A (C1-C9/O1-O3) and 1,5-dichlorobenzene ring B (C10-C15/CL1/CL2) are roughly planar with root mean square (r.m.s) deviation of 0.0061 and 0.0143 Å, respectively. Dihedral angle among mean plane of moiety A and ring B is 84.95 (3)° indicating that moiety A and ring B are almost perpendicular to each other. Selected bond lengths and bond angles are specified in Table S1. The molecular configuration of **3** is stabilized by intramolecular O-H...O bonding to form S (5) loop. The molecules are interlinked in the form of dimers



by strong O-H...O bonding to form  $R_2^2(10)$  loop in which carbonyl O-atom acts as H-bond acceptor. The dimers are interlinked through comparatively weak C-H...O bonding to form  $R_2^2(16)$  loop in which O-atom of hydroxyl group acts as H-bond acceptor as displayed in Fig. S11 and specified in Table S2. C11 zigzag chain is formed by the combination of O-H...O and C-H...O bonding that runs along b crystallographic axis. Crystal packing is further stabilized by off-set  $\pi$ ... $\pi$  stacking interaction between aromatic rings of molecules with inter-centroid separation ranges from 3.81 Å to 4.36 Å that result in the formation of zigzag infinite chain along b crystallographic axis as displayed in Fig. S12. Ring off-set for this interaction ranges from 1.670 Å to 2.851 Å. Non-covalent interactions of type C-Cl... $\pi$  and C-O... $\pi$  is also found that helps in further stabilization of crystal packing.

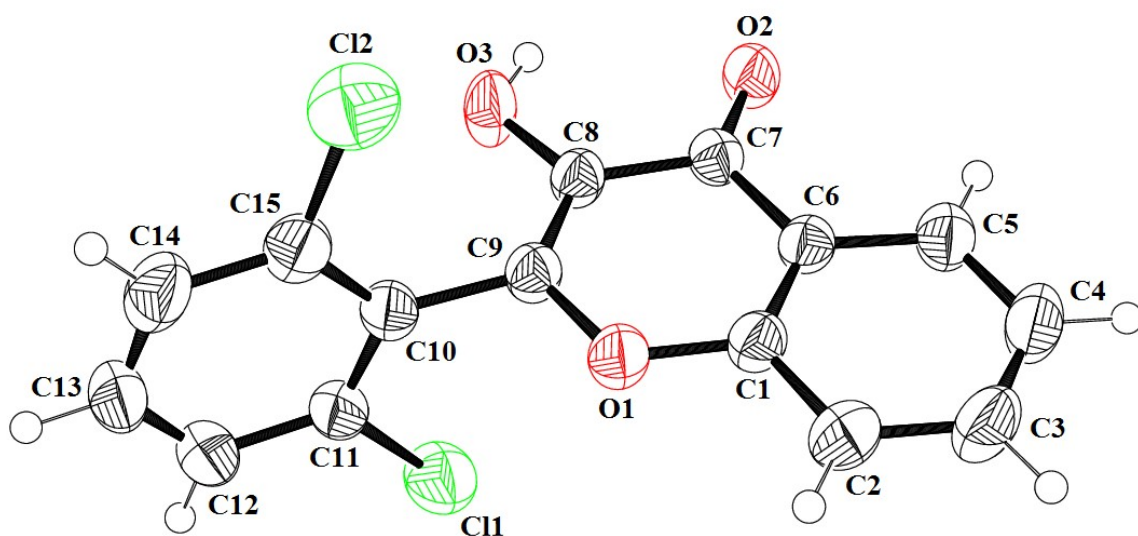

**Fig. S10** ORTEP diagram of **3** drawn at probability level of 50%. H-atoms are shown by small circle of arbitrary radii.

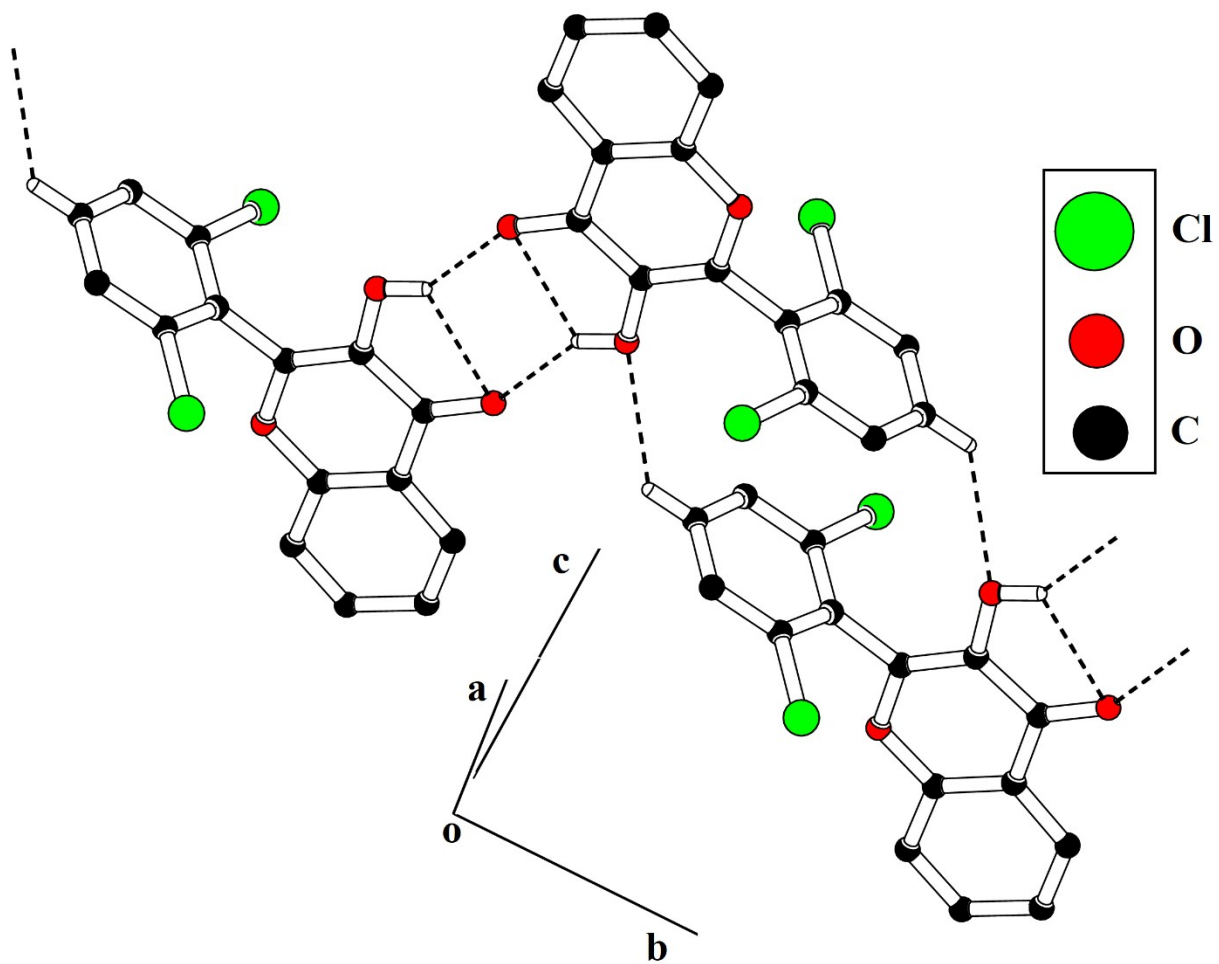

**Fig. S11** packing diagram of **3** showing dimerization of molecules through H-bonding. Selected H-atoms are shown for clarity.

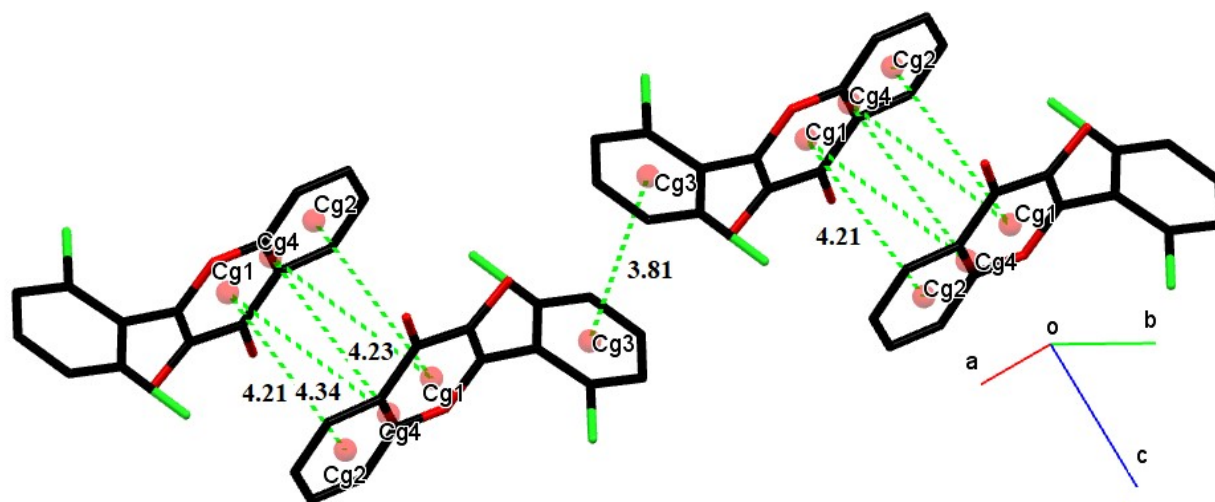

**Fig. S12** Graphical representation of off-set  $\pi$ ... $\pi$  stacking interaction in **3**. H-atoms are not shown for clarity. Distances are measured in Å.

**Table S1** Selected bond lengths (Å) and bond angles (°) in **1, 2, 3**

| <b>Bond lengths</b> | <b>1</b>  | <b>2</b>  | <b>3</b>  |
|---------------------|-----------|-----------|-----------|
| O1-C1               | 1.361 (2) | 1.368 (2) | 1.370 (2) |
| O1-C9               | 1.368 (2) | 1.366 (2) | 1.362 (2) |
| O2-C7               | 1.235 (2) | 1.236 (2) | 1.235 (2) |
| O3-C8               | 1.352 (2) | 1.352 (2) | 1.345 (2) |
| Cl1-C11             | 1.733 (2) | 1.719 (2) | 1.734 (2) |
| Cl2-C12             | -         | 1.729 (2) | -         |
| Cl2-C13             | 1.735 (2) | -         | -         |
| Cl2-C15             | -         | -         | 1.731 (2) |
| <b>Bond angles</b>  | <b>1</b>  | <b>2</b>  | <b>3</b>  |
| C1-O1-C9            | 119.3 (1) | 119.3 (1) | 118.8 (1) |
| O1-C9-C8            | 122.7 (1) | 122.3 (1) | 123.0 (1) |
| C9-C8-O3            | 119.1 (1) | 118.9 (2) | 118.5 (1) |
| C8-C7-O2            | 122.0 (1) | 121.5 (2) | 121.3 (1) |
| O2-C7-C6            | 122.9 (2) | 123.6 (2) | 123.9 (1) |
| C10-C11-Cl1         | 120.5 (1) | 120.1 (1) | 119.0 (1) |
| C12-C13-Cl2         | 118.5 (1) | -         | -         |
| C12-C11-Cl2         | -         | 120.3 (2) | -         |
| C10-C15-Cl2         | -         | -         | 119.6 (1) |

**Table S2: Hydrogen-bond geometric features with symmetry codes for compounds 1, 2 and 3**

| <b>Compound</b> | <b>D—H...A</b>                                       | <b>D—H</b> | <b>H...A</b> | <b>D...A</b> | <b>D—H...A</b> |
|-----------------|------------------------------------------------------|------------|--------------|--------------|----------------|
| <b>1</b>        | O3—H3A...O2                                          | 0.82       | 2.36         | 2.7715 (15)  | 112            |
|                 | O3—H3A...O2 <sup>i</sup> (i) $-x+3, -y+1, -z$        | 0.82       | 1.94         | 2.6820 (14)  | 150            |
| <b>2</b>        | O3—H3A...O2 <sup>ii</sup> (ii) $-x, -y+1, -z+1$      | 0.82       | 1.94         | 2.6973 (18)  | 154            |
|                 | C13—H13...O3 <sup>iii</sup> (iii) $-x+1, -y+1, -z+1$ | 0.93       | 2.47         | 3.247 (2)    | 141            |
| <b>3</b>        | O3—H3A...O2                                          | 0.82       | 2.35         | 2.7690 (17)  | 112            |
|                 | O3—H3A...O2 <sup>iv</sup> (iv) $-x, -y, -z$          | 0.82       | 1.98         | 2.6846 (16)  | 144            |
|                 | C13—H13...O3 <sup>v</sup> (v) $-x, -y+1, -z$         | 0.93       | 2.48         | 3.181 (2)    | 132            |
